# Supplementary material for: New insights into the selectivity of four 1,10-phenanthroline-derived ligands toward the separation of trivalent actinides and lanthanides: a DFT based comparison study
Source: Royal Society of Chemistry journal article supplement (doi:10.1039/c6dt00296j), 2016-01-01
Supplement: c6dt00296j1.pdf [file c6dt00296j1.pdf]

## Electronic Supplementary Information

to the paper “New Insights into the Selectivity of Four 1,10-Phenanthroline-Derived Ligands toward the Separation of Trivalent Actinides and Lanthanides: A DFT Based Comparison Study” by Han Wu, Qun-Yan Wu, Cong-Zhi Wang, Jian-Hui Lan, Zhi-Rong Liu, Zhi-Fang Chai and Wei-Qun Shi

### Contents:

**Figure S1.** The ESP maps of DHDIPhen, BQPhen, Ph<sub>2</sub>-BTPhen and CyMe<sub>4</sub>-BTPhen.

**Figure S2.** The ESP maps of substituents and phenanthroline.

**Table S1.** Properties of Substituents and Phenanthroline.

**Table S2.** NBO Populations of Am and Eu atoms in Complexes.

**Table S3.** Contribution (%) of Metal Atoms and the Nitrogen of ligand (N<sub>L</sub>) and Oxygen Atoms of Nitrate Anion (O<sub>N</sub>) to the Delocalized Canonical MOs for Complexes ML<sub>a</sub>(NO<sub>3</sub>)<sub>3</sub> and ML<sub>c</sub>(NO<sub>3</sub>)<sub>3</sub> (M=Eu, Am).

**Table S4** Changes of Gibbs Free Energies (ΔG, kcal/mol) for Complexation Reactions of 1:1 Metal to Ligands Ratio in Gas and Cyclohexanone Phases at the BP86/6-311G\*/RECP level of Theory.

**Table S5.** Changes of Gibbs Free Energies (ΔG, kcal/mol) for Complexation Reactions of [M(NO<sub>3</sub>)(H<sub>2</sub>O)<sub>6</sub>]<sup>2+</sup> (M=Am, Eu) Complexes with Ligands in Gas, Aqueous, n-Octanol and Cyclohexanone Phases at the B3LYP/6-311G\*/RECP Level of Theory.

**Table S6.** Differences in Gibbs Free Energies ( $\Delta\Delta G$ , kcal/mol) Between  $[M(\text{NO}_3)(\text{H}_2\text{O})_6]^{2+}$  (M=Am, Eu) Complexes with Ligands in Gas, Aqueous, n-Octanol, and Cyclohexanone Phases at the B3LYP/6-311G\*/RECP Level.

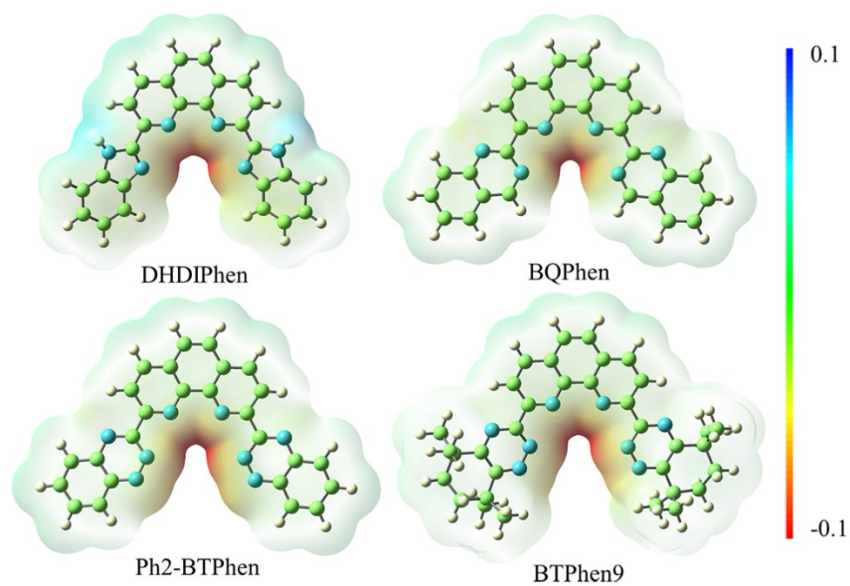

**Fig. S1** The ESP maps of DHDIPhen, BQPhen, Ph2-BTPhen and CyMe<sub>4</sub>-BTPhen.

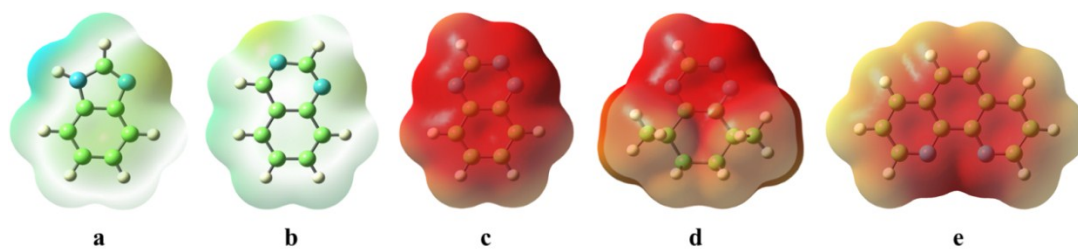

**Fig. S2** The ESP maps of substituents and phenanthroline.

**Table S1** Properties of Substituents and Phenanthroline.<sup>a</sup>

|     | a     | b     | c     | d     | e     | H <sub>2</sub> O | Am <sup>3+</sup> (ref) <sup>#</sup> | Eu <sup>3+</sup> (ref) <sup>#</sup> | H <sub>2</sub> O(ref) <sup>*</sup> |
|-----|-------|-------|-------|-------|-------|------------------|-------------------------------------|-------------------------------------|------------------------------------|
| IP  | 8.32  | 8.75  | 8.49  | 8.09  | 8.08  | 12.53            | -                                   | -                                   | 12.6                               |
| EA  | -1.08 | 0.38  | 0.98  | -0.21 | 0.31  | -2.92            | -                                   | -                                   | -6.4                               |
| χ   | 3.62  | 4.56  | 4.73  | 4.15  | 4.19  | 4.80             | -                                   | -                                   | 3.10                               |
| η   | 4.70  | 4.18  | 3.75  | 3.94  | 7.77  | 7.72             | 7.35                                | 10.75                               | 9.5                                |
| ESP | -1.77 | -1.44 | -1.60 | -1.69 | -2.49 | -                | -                                   | -                                   | -                                  |

<sup>#</sup> D. Manna and T. K. Ghanty, *Phys. Chem. Chem. Phys.*, 2012, **14**, 11060-11069.

<sup>\*</sup> R. G. Pearson, *Inorg. Chem.*, 1988, **77**, 734-740.

<sup>a</sup> IP, EA, χ and η are the ionization potential, electron affinity, electronegativity and hardness, respectively in electronvolts; ESP values are the electronic potential where the metal contacts the nitrogen donor atoms (kcal/mol);

**Table S2** NBO Populations of Am and Eu Atoms in Complexes.

| Complexes                                       | NBO Populations                                       |
|-------------------------------------------------|-------------------------------------------------------|
| ML <sub>a</sub> (NO <sub>3</sub> ) <sub>3</sub> | Eu: [Xe] 6s(0.17) 4f(6.37) 5d(0.73) 6p(0.01) 6d(0.06) |
|                                                 | Am: [Rn] 7s(0.19) 5f(6.30) 6d(1.05) 7p(0.01)          |
| ML <sub>b</sub> (NO <sub>3</sub> ) <sub>3</sub> | Eu: [Xe] 6s(0.16) 4f(6.38) 5d(0.73) 6p(0.01) 6d(0.06) |
|                                                 | Am: [Rn] 7s(0.18) 5f(6.32) 6d(1.03) 7p(0.01)          |
| ML <sub>c</sub> (NO <sub>3</sub> ) <sub>3</sub> | Eu: [Xe] 6s(0.16) 4f(6.38) 5d(0.76) 6p(0.01) 6d(0.06) |
|                                                 | Am: [Rn] 7s(0.18) 5f(6.29) 6d(1.10) 7p(0.01)          |
| ML <sub>d</sub> (NO <sub>3</sub> ) <sub>3</sub> | Eu: [Xe] 6s(0.16) 4f(6.38) 5d(0.74) 6p(0.01) 6d(0.06) |
|                                                 | Am: [Rn] 7s(0.18) 5f(6.31) 6d(1.06) 7p(0.01)          |

**Table S3** Contribution (%) of Metal Atoms and the Nitrogen of Ligand ( $N_L$ ) and Oxygen Atoms of Nitrate Anion ( $O_N$ ) to the Delocalized Canonical MOs for Complexes  $ML_a(NO_3)_3$  and  $ML_c(NO_3)_3$  (M=Eu, Am).

|                |            |                                  |                                  |                                  |                                  |                                  |
|----------------|------------|----------------------------------|----------------------------------|----------------------------------|----------------------------------|----------------------------------|
| $ML_a(NO_3)_3$ |            | <b>MO-82<math>\alpha</math></b>  | <b>MO-160<math>\alpha</math></b> | <b>MO-161<math>\alpha</math></b> | <b>MO-180<math>\alpha</math></b> | <b>MO-182<math>\alpha</math></b> |
|                | Eu         | 5p: 76.85                        | 5d: 3.09                         | 5d: 2.64                         | 4f: 20.13                        | 4f: 14.62                        |
|                | $N_L$      | 2s: 2.07                         | 2p: 30.10<br>2s: 4.58            | 2p: 22.72<br>2s: 3.83            | -                                | -                                |
|                | $O_{(N)}$  | 2p: 7.04                         | 2p: 18.49                        | 2p: 35.37                        | 2p: 34.09                        | 2p: 38.65                        |
|                |            | <b>MO-98<math>\alpha</math></b>  | <b>MO-177<math>\alpha</math></b> | <b>MO-178<math>\alpha</math></b> | <b>MO-196<math>\alpha</math></b> | <b>MO-198<math>\alpha</math></b> |
|                | Am         | 6p: 70.61                        | 6d: 3.09                         | 6d: 4.58                         | 5f: 11.68                        | 5f: 7.09                         |
| $ML_c(NO_3)_3$ | $N_L$      | 2s: 6.40                         | 2p: 35.22<br>2s: 5.96            | 2p: 44.02<br>2s: 5.69            | -                                | -                                |
|                | $O_{(NO)}$ | 2s: 5.22                         | 2p: 15.24                        | 2p: 5.80                         | 2p: 46.26                        | 2p: 23.27                        |
|                |            | <b>MO-84<math>\alpha</math></b>  | <b>MO-166<math>\alpha</math></b> | <b>MO-167<math>\alpha</math></b> | <b>MO-186<math>\alpha</math></b> | <b>MO-188<math>\alpha</math></b> |
|                | Eu         | 5p: 18.73                        | 5d: 6.09                         | 5d: 1.99                         | 4f: 23.03                        | 4f: 26.99                        |
|                | $N_L$      | 2s: 7.84                         | 2p: 12.63<br>2s: 2.56            | 2p: 35.14<br>2s: 4.29            | -                                | -                                |
|                | $O_{(N)}$  | 2p: 5.59                         | 2p: 42.78                        | 2p: 5.73                         | 2p: 37.10                        | 2p: 35.74                        |
| $ML_c(NO_3)_3$ |            | <b>MO-100<math>\alpha</math></b> | <b>MO-181<math>\alpha</math></b> | <b>MO-182<math>\alpha</math></b> | <b>MO-202<math>\alpha</math></b> | <b>MO-204<math>\alpha</math></b> |
|                | Am         | 6p: 16.20                        | 6d: 5.89                         | 5f: 2.36<br>6d: 3.28             | 5f: 1.53<br>6d: 2.38             | 5f: 12.94<br>6d: 1.07            |
|                | $N_L$      | 2s: 5.13                         | 2p: 17.11<br>2s: 3.16            | 2p: 42.14<br>2s: 5.01            | -                                | -                                |
|                | $O_{(N)}$  | 2s: 5.00                         | 2p: 14.24                        | 2p: 4.71                         | 2p: 28.67                        | 2p: 42.51                        |

**Table S4** Changes of Gibbs Free Energies ( $\Delta G$ , kcal/mol) for Complexation Reactions of 1:1 Metal to Ligands Ratio in Gas and Cyclohexanone Phases at the BP86/6-311G\*/RECP level of Theory.

|                                                                                                                                                                  | $\Delta G_{\text{gas}}$ | $\Delta G_{\text{cyc}}$ | $\Delta\Delta G_{\text{gas}}$ | $\Delta\Delta G_{\text{cyc}}$ |
|------------------------------------------------------------------------------------------------------------------------------------------------------------------|-------------------------|-------------------------|-------------------------------|-------------------------------|
| $L_a + [M(\text{NO}_3)_2(\text{H}_2\text{O})_4]^+ + \text{NO}_3^- \rightarrow \text{ML}_a(\text{NO}_3)_3 + 4\text{H}_2\text{O}$                                  | -99.03/-102.75          | -28.11/-30.75           | -3.73                         | -2.64                         |
| $L_b + [M(\text{NO}_3)_2(\text{H}_2\text{O})_4]^+ + \text{NO}_3^- \rightarrow \text{ML}_b(\text{NO}_3)_3 + 4\text{H}_2\text{O}$                                  | -121.14/-124.78         | -31.38/-34.27           | -3.64                         | -2.89                         |
| $L_c + [M(\text{NO}_3)_2(\text{H}_2\text{O})_4]^+ + \text{NO}_3^- \rightarrow \text{ML}_c(\text{NO}_3)_3 + 4\text{H}_2\text{O}$                                  | -116.17/-121.65         | -31.94/-35.35           | -5.49                         | -3.41                         |
| $L_d + [M(\text{NO}_3)_2(\text{H}_2\text{O})_4]^+ + \text{NO}_3^- \rightarrow \text{ML}_d(\text{NO}_3)_3 + 4\text{H}_2\text{O}$                                  | -117.24/-122.03         | -32.82/-36.29           | -4.79                         | -3.47                         |
| $\text{HL} + a + [M(\text{NO}_3)_2(\text{H}_2\text{O})_4]^+ + \text{NO}_3^- \rightarrow \text{ML}_a(\text{NO}_3)_3 + 3\text{H}_2\text{O} + \text{H}_3\text{O}^+$ | -36.14/-39.87           | -10.08/-12.71           | -3.73                         | -2.64                         |
| $\text{HL} + b + [M(\text{NO}_3)_2(\text{H}_2\text{O})_4]^+ + \text{NO}_3^- \rightarrow \text{ML}_b(\text{NO}_3)_3 + 3\text{H}_2\text{O} + \text{H}_3\text{O}^+$ | -33.60/-37.24           | -5.54/-8.43             | -3.64                         | -2.89                         |
| $\text{HL} + c + [M(\text{NO}_3)_2(\text{H}_2\text{O})_4]^+ + \text{NO}_3^- \rightarrow \text{ML}_c(\text{NO}_3)_3 + 3\text{H}_2\text{O} + \text{H}_3\text{O}^+$ | -32.96/-38.44           | -7.58/-10.99            | -5.49                         | -3.41                         |
| $\text{HL} + d + [M(\text{NO}_3)_2(\text{H}_2\text{O})_4]^+ + \text{NO}_3^- \rightarrow \text{ML}_d(\text{NO}_3)_3 + 3\text{H}_2\text{O} + \text{H}_3\text{O}^+$ | -33.55/-38.34           | -8.51/-12.00            | -4.79                         | -3.47                         |

<sup>a</sup>.../... represent the results of Eu and Am complexes, respectively.

**Table S5** Changes of Gibbs Free Energies ( $\Delta G$ , kcal/mol) for Complexation Reactions of  $[M(\text{NO}_3)(\text{H}_2\text{O})_6]^{2+}$  (M=Am, Eu) Complexes with Ligands in Gas, Aqueous, n-Octanol and Cyclohexanone Phases at the B3LYP/6-311G\*/RECP level of Theory. <sup>a</sup>

|                                                                                                                                               | $\Delta G_{\text{gas}}$ | $\Delta G_{\text{water}}$ | $\Delta G_{\text{n-oct}}$ | $\Delta G_{\text{cyc}}$ |
|-----------------------------------------------------------------------------------------------------------------------------------------------|-------------------------|---------------------------|---------------------------|-------------------------|
| $L_a + [M(\text{NO}_3)(\text{H}_2\text{O})_6]^{2+} + 2\text{NO}_3^- \rightarrow \text{ML}_a(\text{NO}_3)_3 + 4\text{H}_2\text{O}$             | -281.42/-287.30         | -33.19/-37.70             | -28.32/-32.74             | -42.42/-46.58           |
| $L_b + [M(\text{NO}_3)(\text{H}_2\text{O})_6]^{2+} + 2\text{NO}_3^- \rightarrow \text{ML}_b(\text{NO}_3)_3 + 4\text{H}_2\text{O}$             | -303.54/-309.33         | -35.08/-39.90             | -32.97/-37.78             | -45.69/-50.10           |
| $L_c + [M(\text{NO}_3)(\text{H}_2\text{O})_6]^{2+} + 2\text{NO}_3^- \rightarrow \text{ML}_c(\text{NO}_3)_3 + 4\text{H}_2\text{O}$             | -298.56/-306.20         | -35.45/-41.17             | -32.39/-38.01             | -46.25/-51.19           |
| $L_d + [M(\text{NO}_3)(\text{H}_2\text{O})_6]^{2+} + 2\text{NO}_3^- \rightarrow \text{ML}_d(\text{NO}_3)_3 + 4\text{H}_2\text{O}$             | -299.64/-306.58         | -35.15/-40.35             | -31.95/-37.19             | -47.13/-52.12           |
| $\text{HL} + a + [M(\text{NO}_3)(\text{H}_2\text{O})_6]^{2+} + 2\text{NO}_3^- \rightarrow \text{ML}_a(\text{NO}_3)_3 + 3\text{H}_2\text{O} +$ | -218.54/-224.42         | -12.96/-17.47             | -12.03/-16.45             | -24.38/-28.54           |
| $\text{HL} + b + [M(\text{NO}_3)(\text{H}_2\text{O})_6]^{2+} + 2\text{NO}_3^- \rightarrow \text{ML}_b(\text{NO}_3)_3 + 3\text{H}_2\text{O} +$ | -216.00/-221.79         | -8.47/-13.30              | -7.62/-13.73              | -19.85/-24.26           |
| $\text{HL} + c + [M(\text{NO}_3)(\text{H}_2\text{O})_6]^{2+} + 2\text{NO}_3^- \rightarrow \text{ML}_c(\text{NO}_3)_3 + 3\text{H}_2\text{O} +$ | -215.35/-222.99         | -9.51/-15.23              | -8.11/-12.42              | -21.89/-26.82           |
| $\text{HL} + d + [M(\text{NO}_3)(\text{H}_2\text{O})_6]^{2+} + 2\text{NO}_3^- \rightarrow \text{ML}_d(\text{NO}_3)_3 + 3\text{H}_2\text{O} +$ | -215.94/-222.88         | -8.54/-13.74              | -12.03/-12.44             | -22.82/-27.81           |

<sup>a</sup>.../... represent the results of Eu and Am complexes, respectively.

**Table S6** Differences in Gibbs Free energies ( $\Delta\Delta G$ , kcal/mol) Between  $[M(\text{NO}_3)(\text{H}_2\text{O})_6]^{2+}$  (M=Am, Eu) Complexes with Ligands in Gas, Aqueous, n-Octanol, and Cyclohexanone Phases at the B3LYP/6-311G\*/RECP Level.

|                                                                                                                                   | $\Delta\Delta G_{\text{gas}}$ | $\Delta\Delta G_{\text{water}}$ | $\Delta\Delta G_{\text{n-oct}}$ | $\Delta\Delta G_{\text{cyc}}$ |
|-----------------------------------------------------------------------------------------------------------------------------------|-------------------------------|---------------------------------|---------------------------------|-------------------------------|
| $L_a + [M(\text{NO}_3)(\text{H}_2\text{O})_6]^{2+} + 2\text{NO}_3^- \rightarrow \text{ML}_a(\text{NO}_3)_3 + 4\text{H}_2\text{O}$ | -5.88                         | -4.51                           | -4.42                           | -4.16                         |
| $L_b + [M(\text{NO}_3)(\text{H}_2\text{O})_6]^{2+} + 2\text{NO}_3^- \rightarrow \text{ML}_b(\text{NO}_3)_3 + 4\text{H}_2\text{O}$ | -5.79                         | -4.83                           | -4.80                           | -4.41                         |
| $L_c + [M(\text{NO}_3)(\text{H}_2\text{O})_6]^{2+} + 2\text{NO}_3^- \rightarrow \text{ML}_c(\text{NO}_3)_3 + 4\text{H}_2\text{O}$ | -7.64                         | -5.72                           | -5.62                           | -4.94                         |
| $L_d + [M(\text{NO}_3)(\text{H}_2\text{O})_6]^{2+} + 2\text{NO}_3^- \rightarrow \text{ML}_d(\text{NO}_3)_3 + 4\text{H}_2\text{O}$ | -6.94                         | -5.20                           | -5.24                           | -4.99                         |
